# Supplementary material for: Regulating intermolecular interactions for stable multifunctional organic–inorganic metal halide hybrid glasses
Source: Royal Society of Chemistry journal article supplement (doi:10.1039/d4mh01427h), 2025-01-01
Supplement: d4mh01427h1.pdf [file d4mh01427h1.pdf]

## Supporting Information

### **Regulating Intermolecular Interactions for Stable Multifunctional Organic-Inorganic Metal Halide Hybrid Glasses**

*Chunyan Jiang, Jing Yan, Jianrong Qiu, Mingmei Wu,\* and Beibei Xu\**

## Experimental Section

**Materials.**  $\text{SbCl}_3$  (99%), 1-benzyl-3-methylimidazolium chloride (BzmimCl, 99%), 1-butyl-3-methylimidazolium chloride (BmimCl, 99%), 1-butyl-2,3-dimethylimidazolium chloride (BmmimCl, 99%), N, N-dimethylformamide (DMF), ethanol, and diethyl ether were purchased from Macklin Reagent Company and used without further purification.

**Synthesis of  $\text{Bzmim}_3\text{SbCl}_6$  single crystal.** 2 mmol  $\text{SbCl}_3$  and 6 mmol BzmimCl were weighed and dissolved with 5 mL DMF in a glass bottle. With stirring for 20 min, a clear solution was formed. After filtration with disposable filter, the solution was collected in a glass bottle. With its lid open, the bottle was then placed in a closed chamber filled with diethyl ether. Colorless transparent single crystals of  $\text{Bzmim}_3\text{SbCl}_6$  were obtained through vapor diffusion of diethyl ether into this solution after an overnight period. The crystals were washed with diethyl ether in vacuum filtration devices and dried under reduced pressure at 60 °C for 6h.

**Synthesis of  $\text{Bzmim}_2\text{SbCl}_5$  single crystal.** The synthesis of  $\text{Bzmin}_2\text{SbCl}_5$  single crystals was the same with that of  $\text{Bzmin}_3\text{SbCl}_6$  single crystals except that stoichiometric ratio of 2 mmol  $\text{SbCl}_3$  and 4 mmol BzmimCl were used. After two days, yellow transparent  $\text{Bzmin}_2\text{SbCl}_5$  single crystals were obtained. The crystals were washed with diethyl ether and dried under reduced pressure at 60 °C for 6h.

**Synthesis of  $\text{Bzmim}_3\text{SbCl}_6$  Glass.** The  $\text{Bzmim}_3\text{SbCl}_6$  Glass was prepared by melt-quenching method. Quartz dish was cleaned by ultrasonic with isopropyl alcohol and ultrapure water in sequence, and then it was dried under reduced pressure.  $\text{Bzmim}_3\text{SbCl}_6$  crystal powders were placed in the cleaned quartz dish and heated in hot plate, with holding at 160 °C for 10 min. A molten liquid was obtained, and it was removed and placed in room temperature. Glass was

formed after several mins.

**Synthesis of Bzmim<sub>2</sub>SbCl<sub>5</sub> Glass.** The Bzmim<sub>2</sub>SbCl<sub>5</sub> glass was prepared by the same melt-quenching method. Bzmim<sub>2</sub>SbCl<sub>5</sub> crystal powders were placed in the cleaned quartz dish and then heated in hot plate at 120 °C for 10 min. The molten liquid was removed and placed in room temperature. Glass was formed after several mins.

**Synthesis of Bzmim<sub>2</sub>SbCl<sub>5</sub> Glass Ceramic.** The Bzmim<sub>2</sub>SbCl<sub>5</sub> glass ceramic was prepared by open environment annealing treatment of Bzmim<sub>2</sub>SbCl<sub>5</sub> glass. The Bzmim<sub>2</sub>SbCl<sub>5</sub> glass were placed in hot plate, after holding at 90 °C for 3h, transparent glass ceramic was obtained.

**Synthesis of Bmim<sub>2</sub>SbCl<sub>5</sub> single crystal.** 3 mmol SbCl<sub>3</sub> and 6 mmol BmimCl were weigh and dissolved with 1 mL ethanol in a glass bottle. The mixture was heated in a vial at 70 °C for a duration of 10 minutes, and a transparent, pale yellow solution was yielded. Upon cooling to room temperature, the solution gradually deposited light yellow crystals.

**Synthesis of Bmmim<sub>2</sub>SbCl<sub>5</sub> single crystal.** 1 mmol SbCl<sub>3</sub> and 2 mmol BmmimCl were weigh and transferred into a 20 mL Teflon-lined autoclave reactor. The autoclave reactor was heated at 120 °C for 24 h. The reactor was cooled naturally to room temperature, and single crystals were obtained.

**Characterization.** Single crystal X-ray diffraction data was collected on the Agilent SuperNova single crystal diffractometer at 150 K with the Ga K $\alpha$  ( $\lambda= 1.34138$  nm) radiation. Powder X-ray diffraction patterns were collected on the Bruker D8 advance diffractometer the Cu K $\alpha$  ( $\lambda=1.54184$  nm) radiation at 40 kV and 40 mA. Temperature-dependent powder X-ray diffraction patterns measurements were performed on the Rigaku Smartlab diffractometer equipping with a temperature control sample holder. Thermogravimetry analysis was carried

out on the Netzsch TG 209F1 Libra system at a heating rate of 10 K/min under a nitrogen atmosphere. Differential scanning calorimetry measurement was performed on the TA DSC 2500 instrument at a heating rate of 5-30 K/min and cooling rate of 30 K/min under a nitrogen atmosphere. Raman spectra was recorded on the RENISHAW InVia-Reflex Micro-Confoal Raman spectrometer using an incident 785 nm laser. X-ray photoelectron spectroscopy was performed by using ESCALAB QXi spectrometer (ThermoFisher Scientific, USA) with non-monochromatic Al Ka X-ray (1486.6 eV) at pass energy of 50 eV and 200 eV to determine the chemical environment of the samples. UV-Vis transmittance and diffuse reflectance spectra were measured on the Cary 5000 UV-vis-near-IR spectrophotometer, and BaSO<sub>4</sub> powder was used as the standard reference for diffuse reflectance spectra. Steady state and time resolved photoluminescence spectra were recorded in the Edinburgh FLS1000 spectrometer with 450 W Xenon lamp and 350 nm picoseconds pulsed diode laser with a repetition rate of 10 MHz (100 ns) were used as the excitation source, respectively. Temperature dependent photoluminescence spectra were recorded in the same spectrometer with the equipment of an Oxford cryostat. Luminescence quantum efficiency was acquired in the same spectrometer using BaSO<sub>4</sub> coated integrating sphere as sample holder. *In-situ* polarizing optical microscopy images were collected on the Leica DM2700P Microsystems with a homemade temperature control sample stage. Scanning electron microscope images were taken on a JSM-IT200A field emission microscope (JEOL, Japan). The viscosity of melt was measured in a flowing nitrogen atmosphere on a TA ARES-G2 rheometer (TA, USA) with a parallel-plate geometry (20 cm) at shear rate of 10 s<sup>-1</sup> and 1 s<sup>-1</sup>. Hirshfeld analysis was conducted on Crystal Explorer program.

**Computational details.** The initial structures were excised from the corresponding crystal

structure, and hybrid functional B3LYP-D3(BJ) with mixed basis set (def2-SVP for Sb atoms and 6-31G\* for all other atoms) were used for hydrogen atoms optimization. All the optimizations were performed on Gaussian 09 program. The symmetry adapted perturbation theory (SAPT) was employed to identify the contribution of electrostatic, exchange, induction, and dispersion items to the total intermolecular interaction energy. The calculation was performed on PSI4 program with SAPT2+(3) $\delta$ MP2/aug-cc-pVTZ level as implemented in PSI4 program. Moreover, to visualize interactions in OIMH, the independent gradient model based on Hirshfeld partition analysis was carried out with Multiwfn program.

[CCDC 2358246, 2358247 contains the supplementary crystallographic data for this paper. These data can be obtained free of charge from The Cambridge Crystallographic Data Centre via [www.ccdc.cam.ac.uk/data\\_request/cif](http://www.ccdc.cam.ac.uk/data_request/cif).]

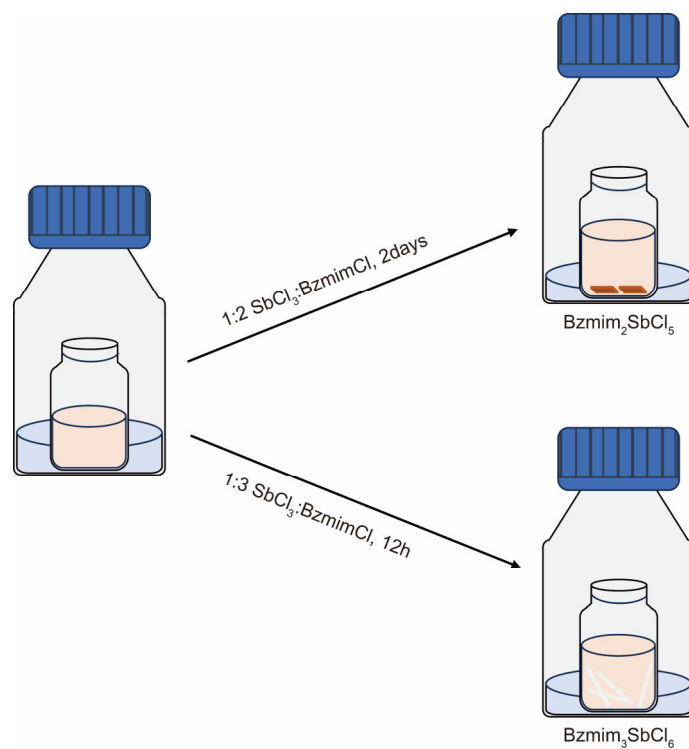

Figure S1. Schematic diagram of a  $\text{Bzmim}_3\text{SbCl}_6$  and  $\text{Bzmim}_2\text{SbCl}_5$  single crystals being grown by anti-solvent diffusion method.

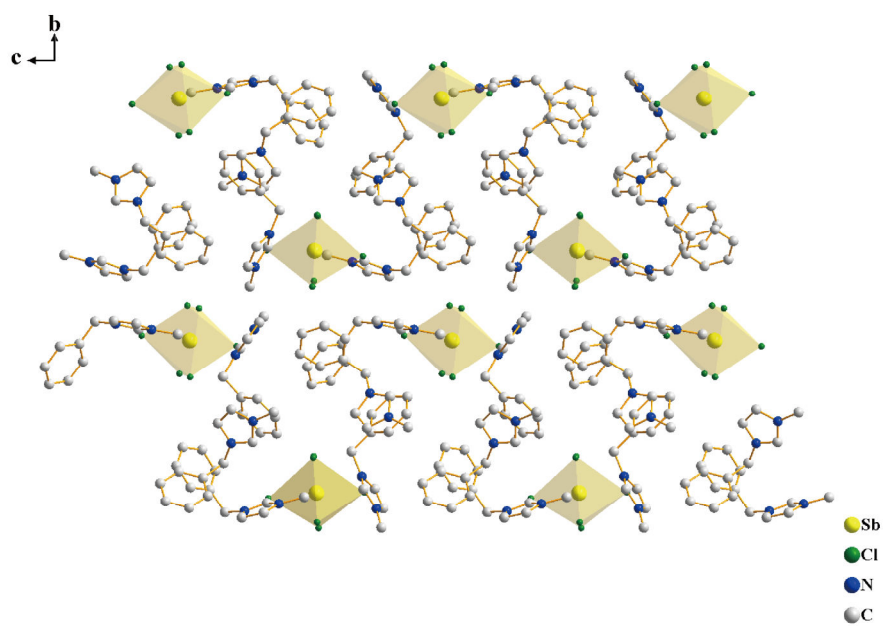

Figure S2. Stacking view of single crystal structure of Bzmim<sub>3</sub>SbCl<sub>6</sub> from [100].

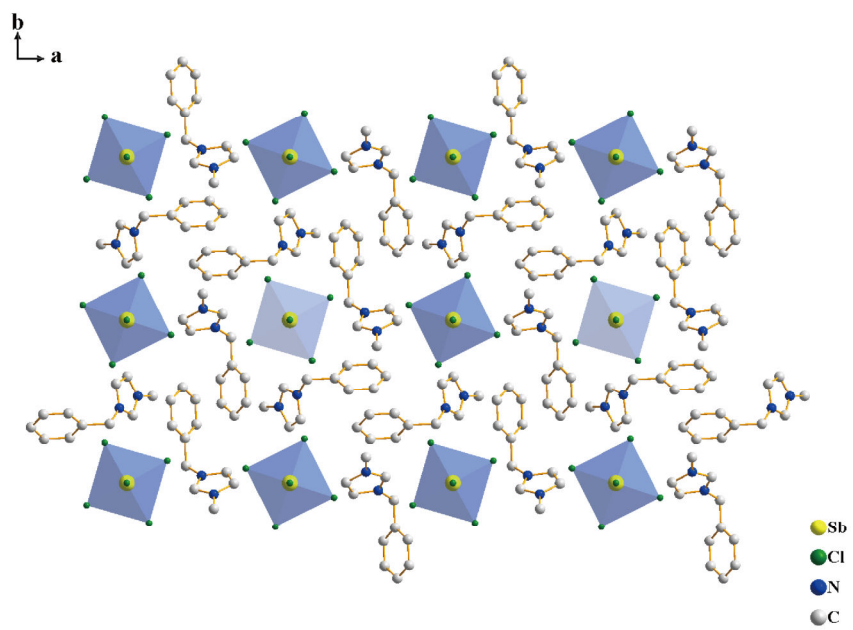

Figure S3. Stacking view of single crystal structure of Bzmim<sub>2</sub>SbCl<sub>5</sub> from [001].



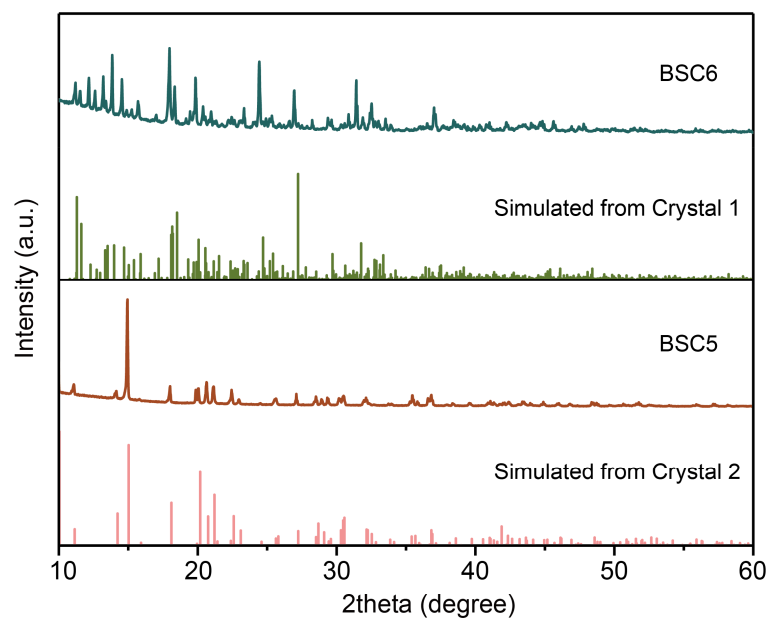

Figure S4. Powder XRD patterns of Bzmim<sub>3</sub>SbCl<sub>6</sub> and Bzmim<sub>2</sub>SbCl<sub>5</sub> single crystals.

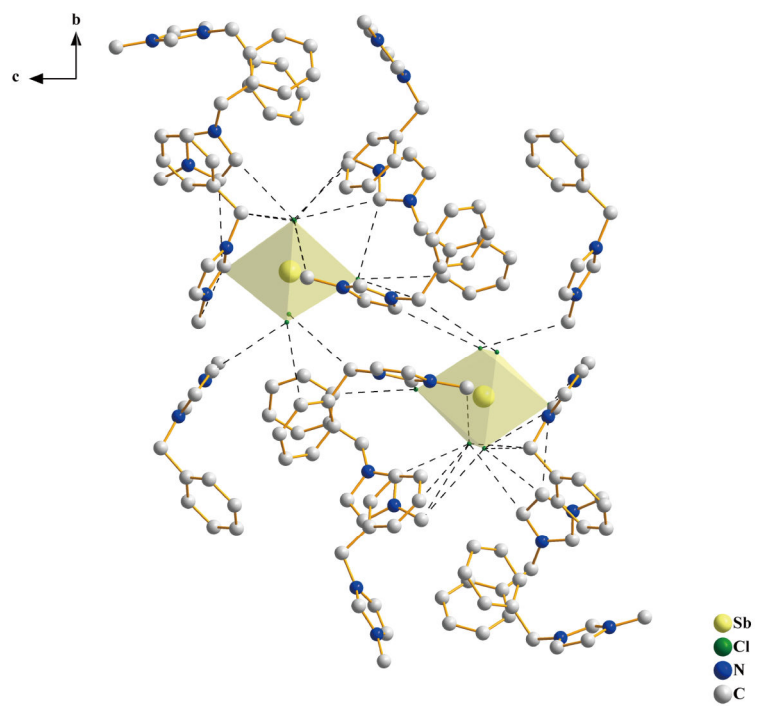

Figure S5. Hydrogen bonds in Bzmim<sub>3</sub>SbCl<sub>6</sub>.

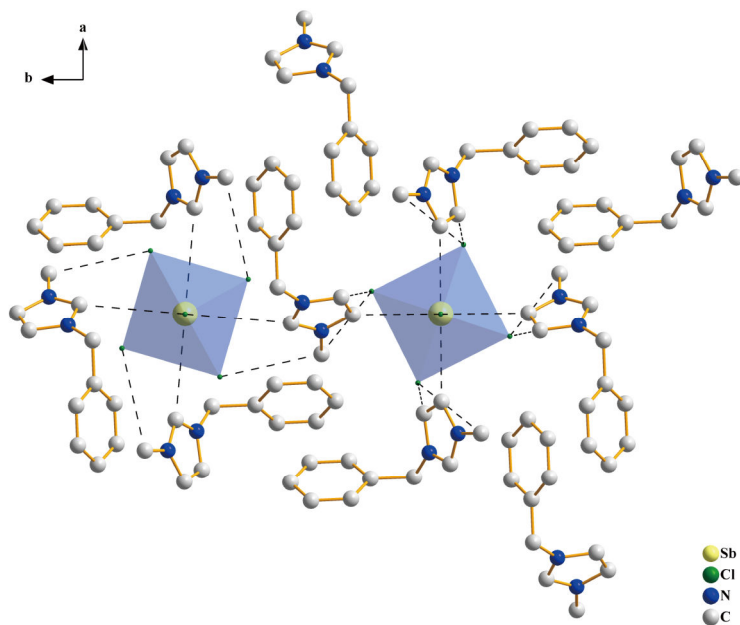

Figure S6. Hydrogen bonds in Bzmim<sub>2</sub>SbCl<sub>5</sub>.

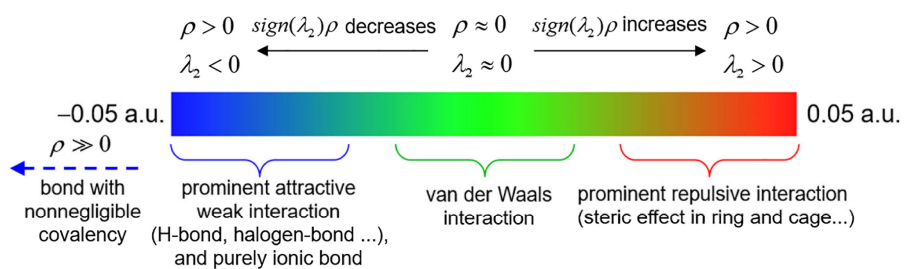

Figure S7. Color-bar of independent gradient model based on Hirshfeld partition (IGMH) analysis.

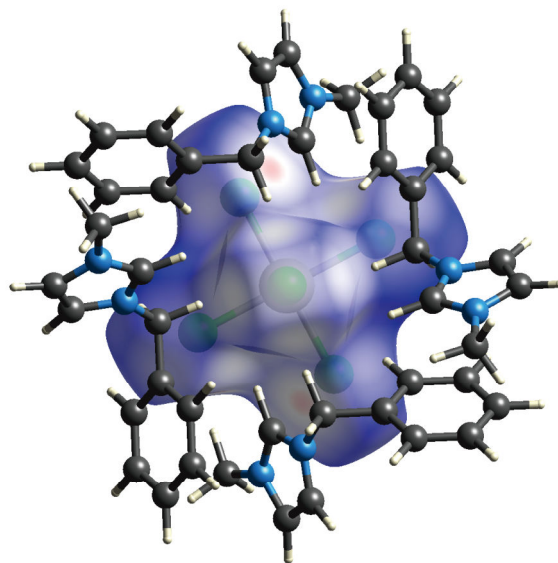

Figure S8. Hirshfeld surfaces of  $\text{Sb1Cl}_5^{2-}$  surrounded by a cluster of neighboring molecules. Red indicating distances smaller than the van der Waals separation distance, white indicating distances equal to it, and blue indicating distances larger than the van der Waals separation distance.

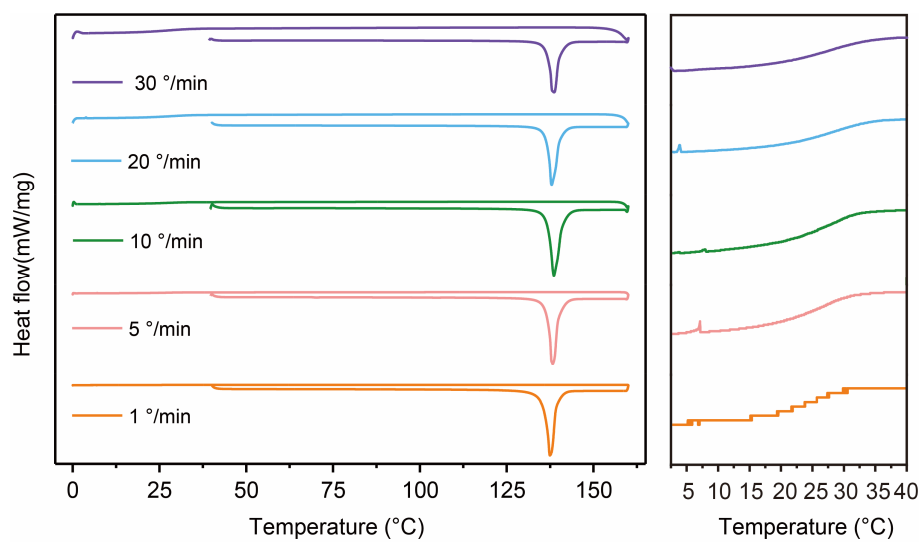

Figure S9. DSC curves of Bzmim<sub>3</sub>SbCl<sub>6</sub> at heating rate of 20 °/min and cooling rate of 1, 5, 10, 20, 30 °/min.

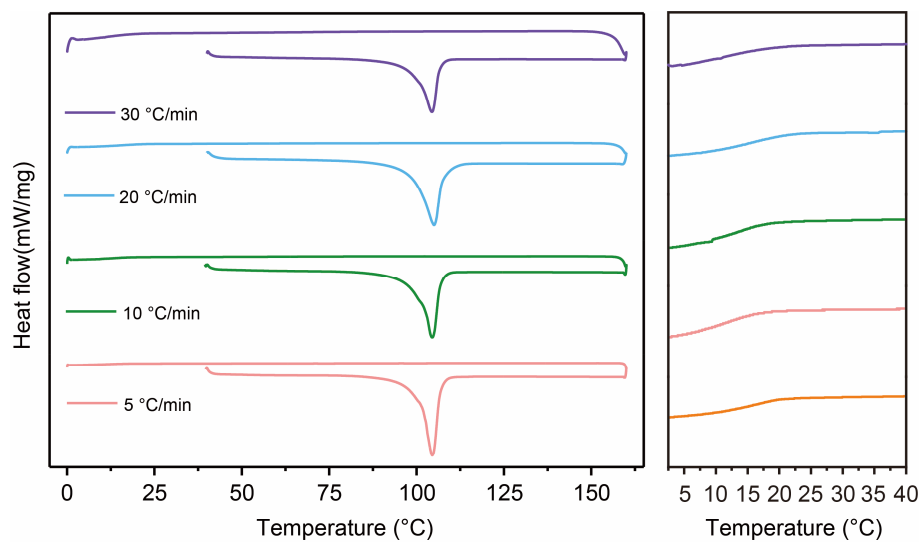

Figure S10. DSC curves of Bzmim<sub>2</sub>SbCl<sub>5</sub> at heating rate of 20 °/min and cooling rate of 1, 5, 10, 20, 30 °/min.

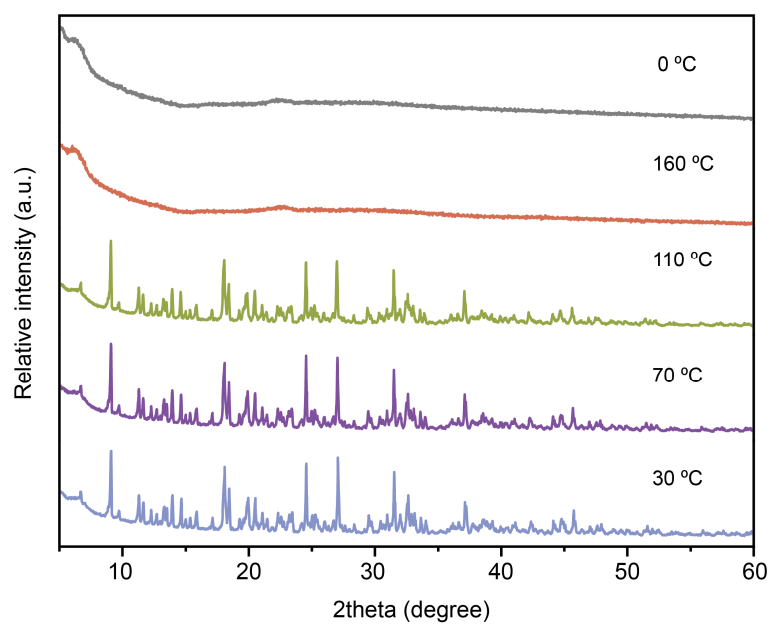

Figure S11. Temperature dependent XRD patterns of Bzmim<sub>3</sub>SbCl<sub>6</sub>.



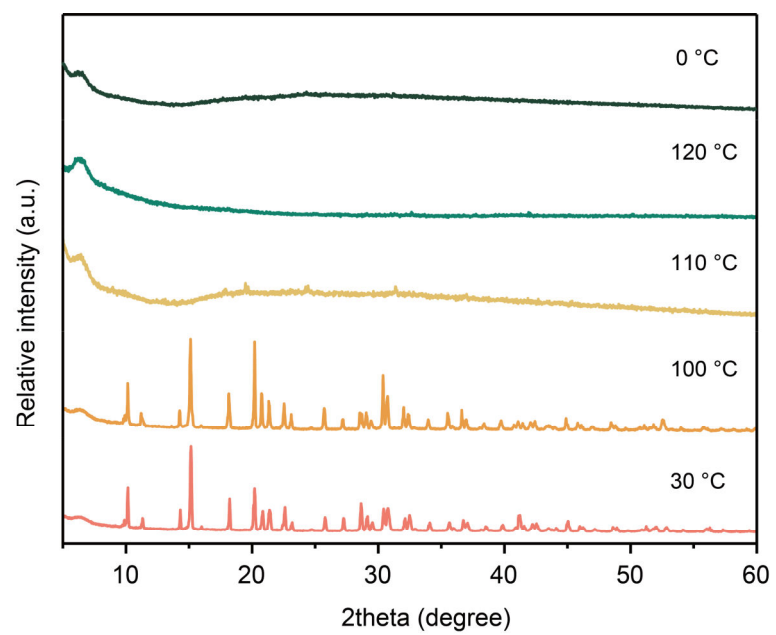

Figure S12. Temperature dependent XRD patterns of Bzmim<sub>2</sub>SbCl<sub>5</sub>.

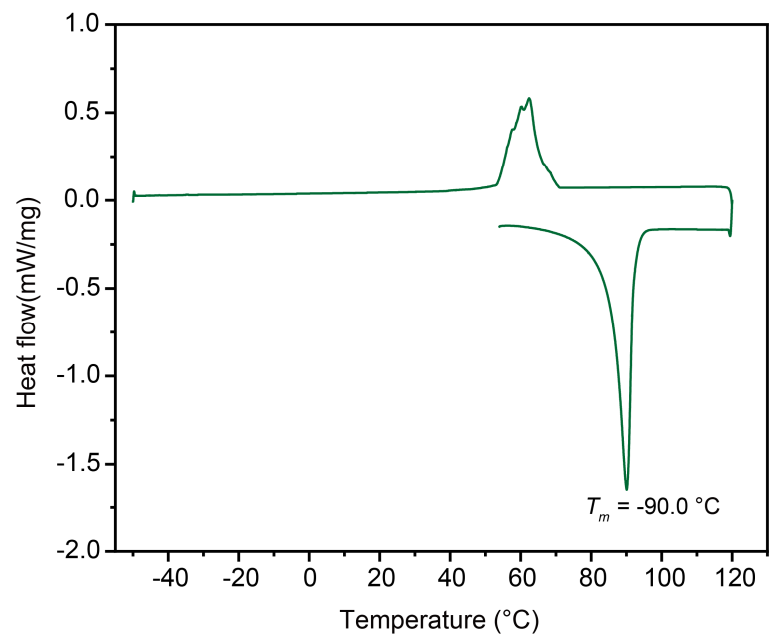

Figure S13. DSC curves of Bmim<sub>2</sub>SbCl<sub>5</sub> at heating rate of 10 °/min and cooling rate of 10 °/min.

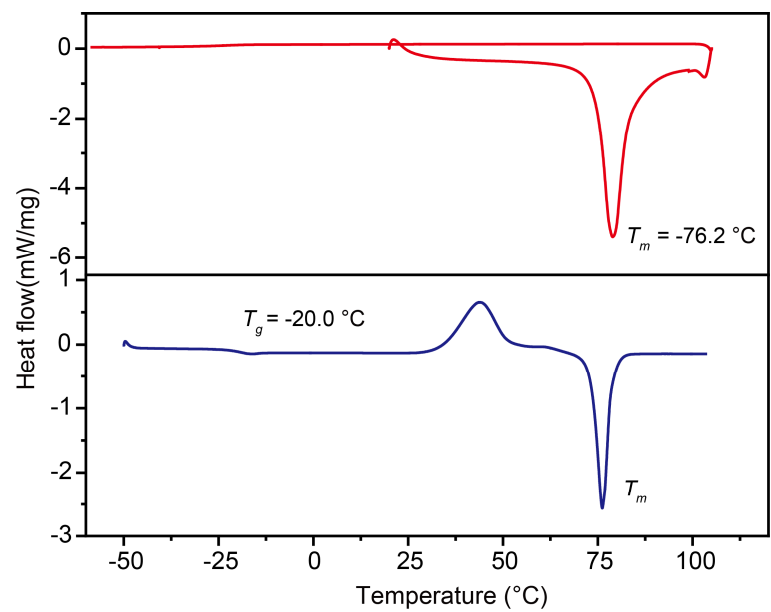

Figure S14. DSC curves of Bmmim<sub>2</sub>SbCl<sub>5</sub> at heating rate of 10 °/min and cooling rate of 10 °/min.

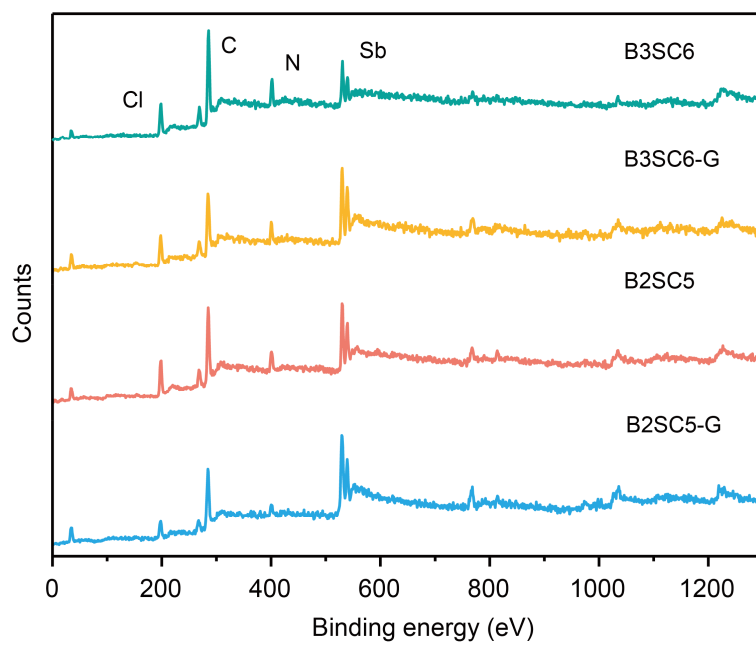

Figure S15. Survey XPS spectra of Bzmim<sub>3</sub>SbCl<sub>6</sub>, Bzmim<sub>3</sub>SbCl<sub>6</sub> glass, Bzmim<sub>2</sub>SbCl<sub>5</sub>, and Bzmim<sub>2</sub>SbCl<sub>5</sub> glass.

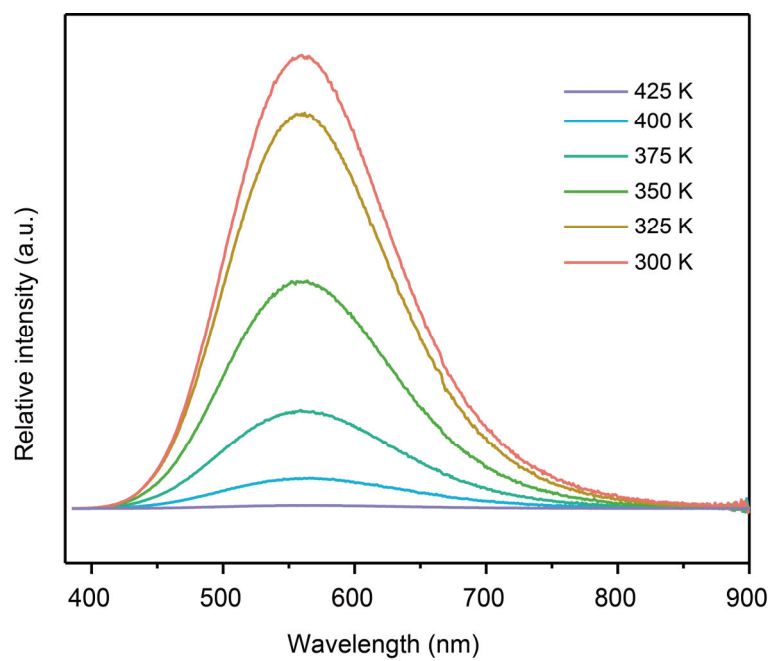

Figure S16. Temperature dependent emission spectra of Bzmim<sub>3</sub>SbCl<sub>6</sub> ( $\lambda_{\text{ex}} = 365$  nm).

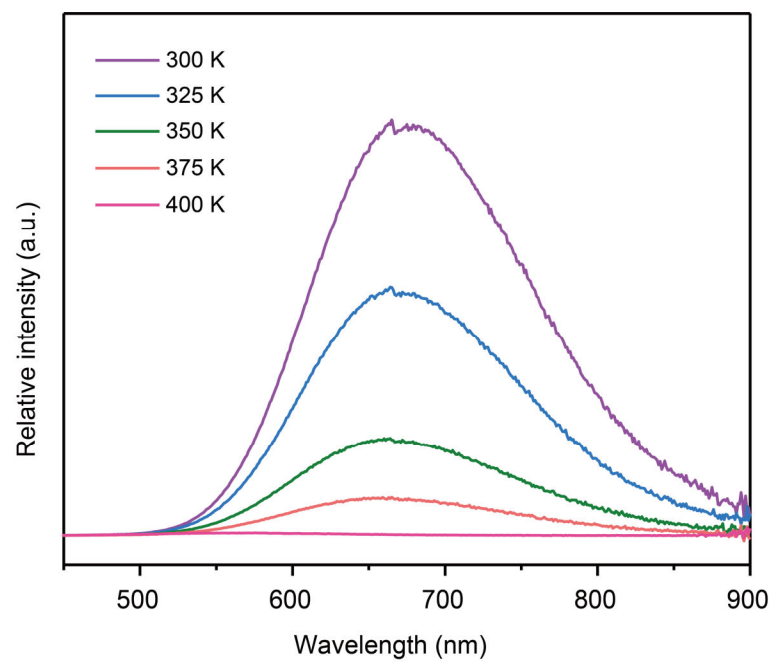

Figure S17. Temperature dependent emission spectra of Bzmim<sub>2</sub>SbCl<sub>5</sub> ( $\lambda_{\text{ex}} = 365$  nm).

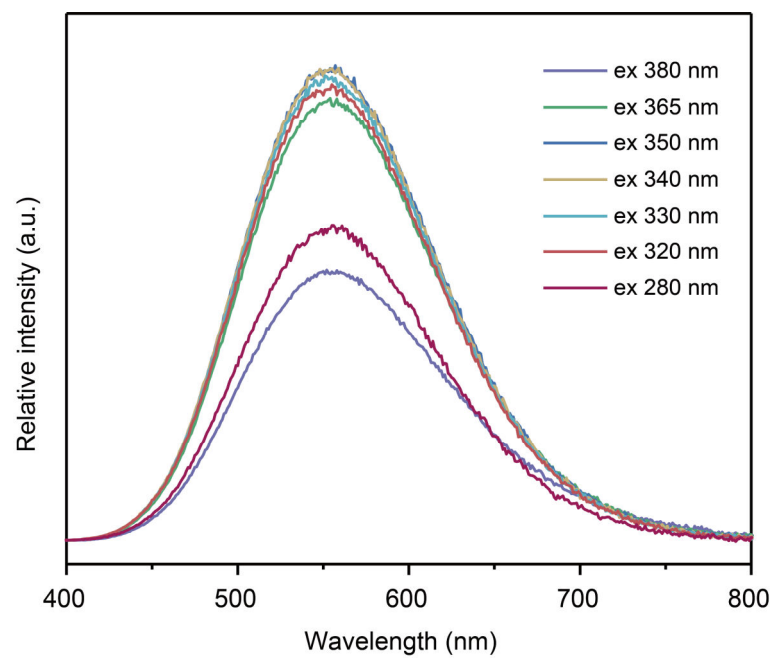

Figure S18. Emission spectra of Bzmim<sub>3</sub>SbCl<sub>6</sub> at different excitation wavelengths.

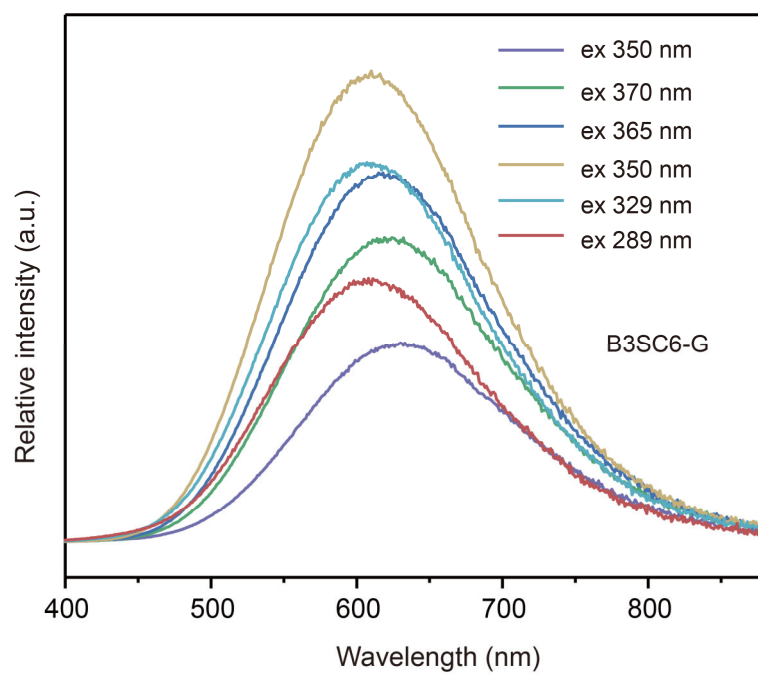

Figure S19. Excitation wavelength dependent emission spectra of Bzmim<sub>3</sub>SbCl<sub>6</sub> glass.



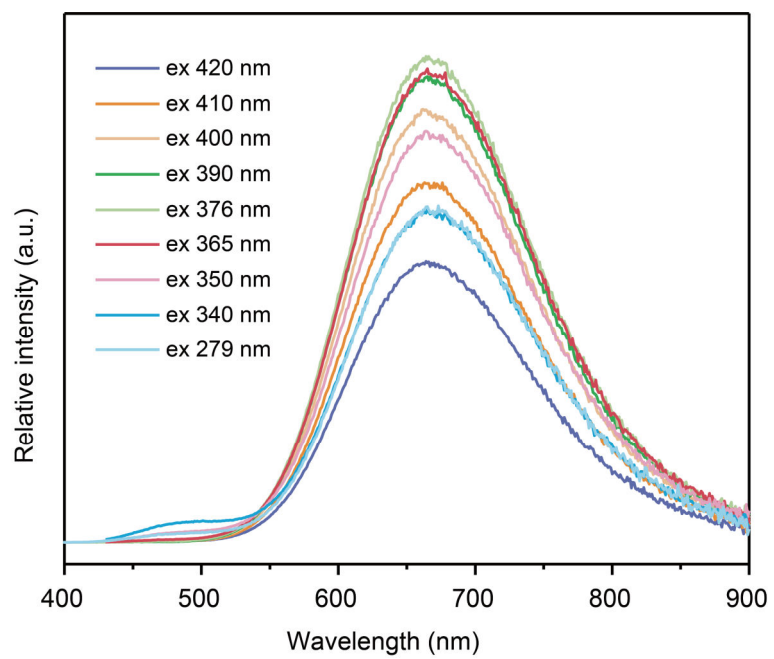

Figure S20. Emission spectra of Bzmim<sub>2</sub>SbCl<sub>5</sub> at different excitation wavelengths.

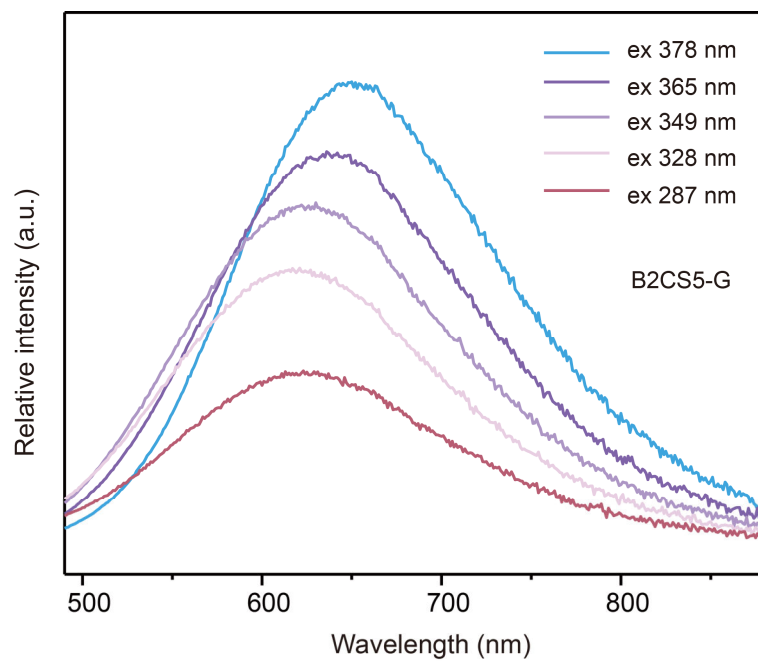

Figure S21. Excitation wavelength dependent emission spectra of Bzmim<sub>2</sub>SbCl<sub>5</sub> glass.

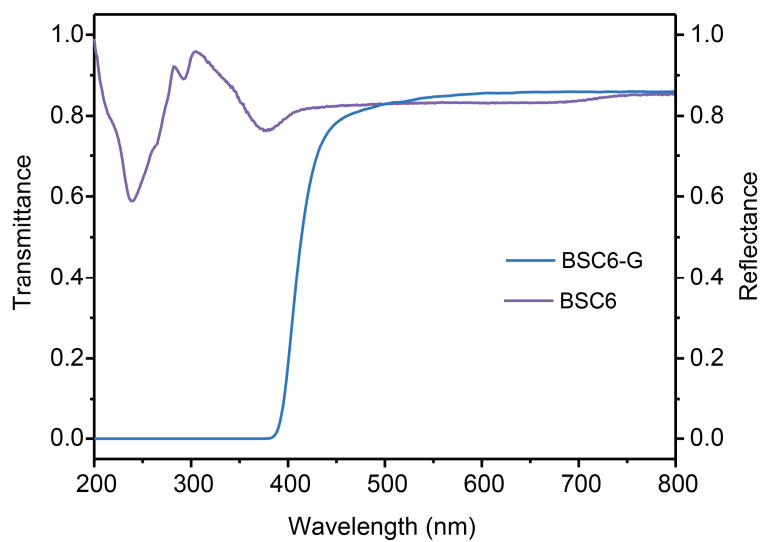

Figure S22. The UV-Vis transmittance spectrum of  $\text{Bzmim}_3\text{SbCl}_6$  glass and diffuse reflection spectrum of  $\text{Bzmim}_3\text{SbCl}_6$ .

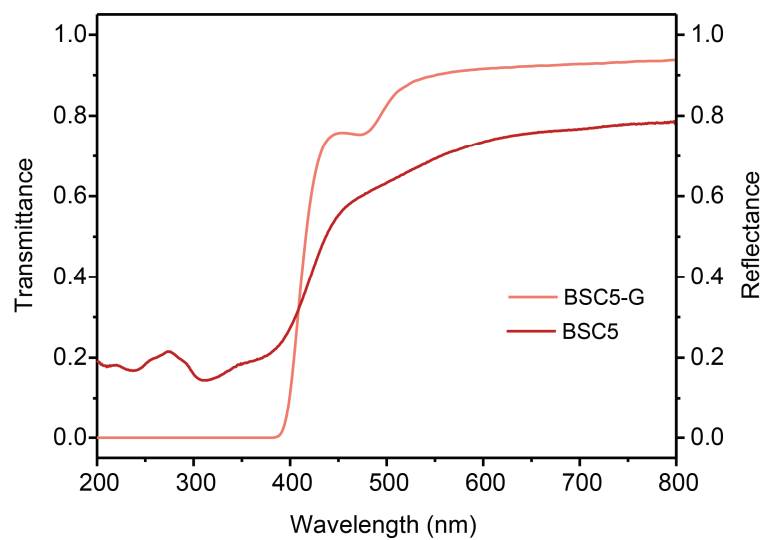

Figure S23. The UV-Vis transmittance spectrum of  $\text{Bzmim}_2\text{SbCl}_5$  glass and diffuse reflection spectrum of  $\text{Bzmim}_2\text{SbCl}_5$ .

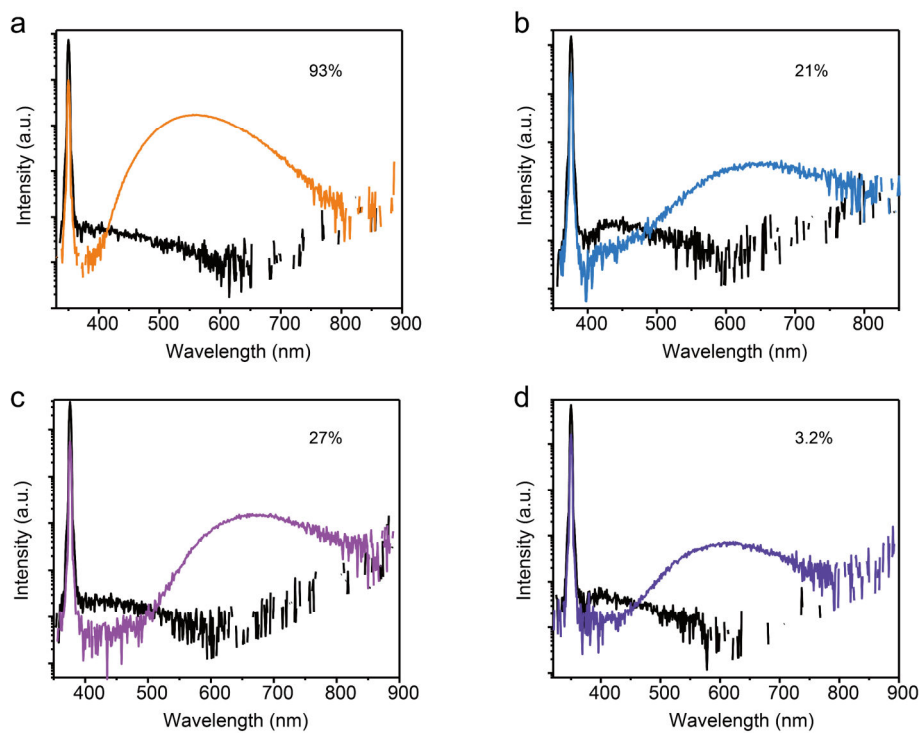

Figure S24. PLQY spectra of (a) Bzmim<sub>3</sub>SbCl<sub>6</sub>, (b) Bzmim<sub>3</sub>SbCl<sub>6</sub> glass, (c) Bzmim<sub>2</sub>SbCl<sub>5</sub>, and (d) Bzmim<sub>2</sub>SbCl<sub>5</sub> glass.

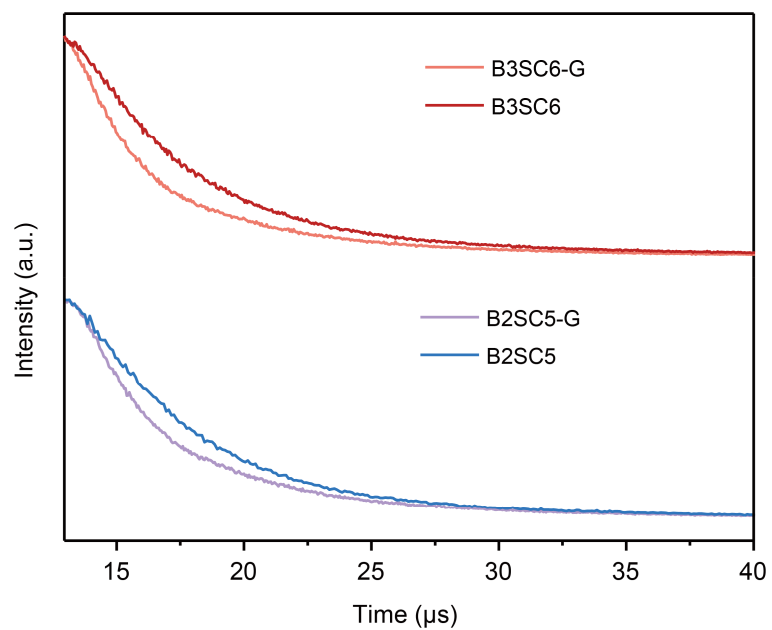

Figure S25. Fluorescence decay curves of Bzmim<sub>3</sub>SbCl<sub>6</sub> glass, Bzmim<sub>3</sub>SbCl<sub>6</sub>, Bzmim<sub>2</sub>SbCl<sub>5</sub> glass, and Bzmim<sub>2</sub>SbCl<sub>5</sub>.

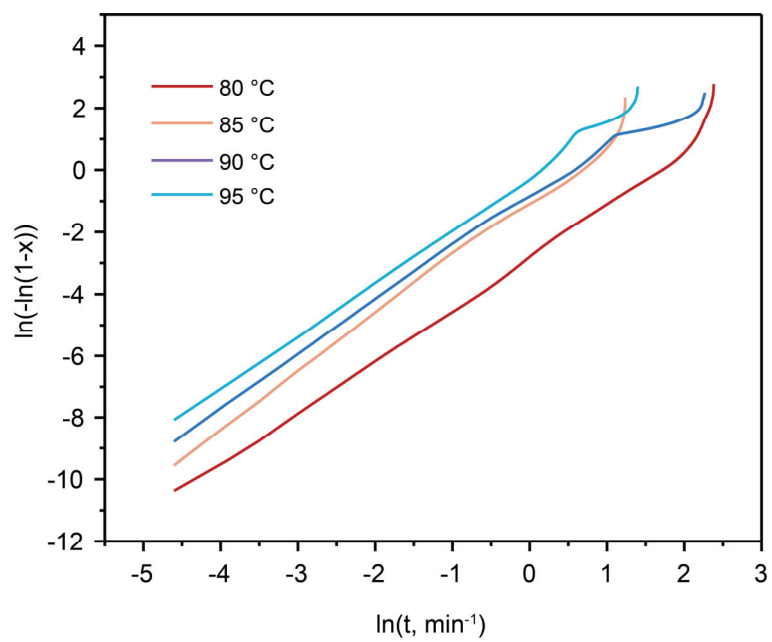

Figure S26. Plots of  $\ln(-\ln(1-x))$  vs  $\ln(t)$ , where  $x$  is the crystallization fraction of  $\text{Bzmim}_3\text{SbCl}_6$  glass,  $t$  is the time.

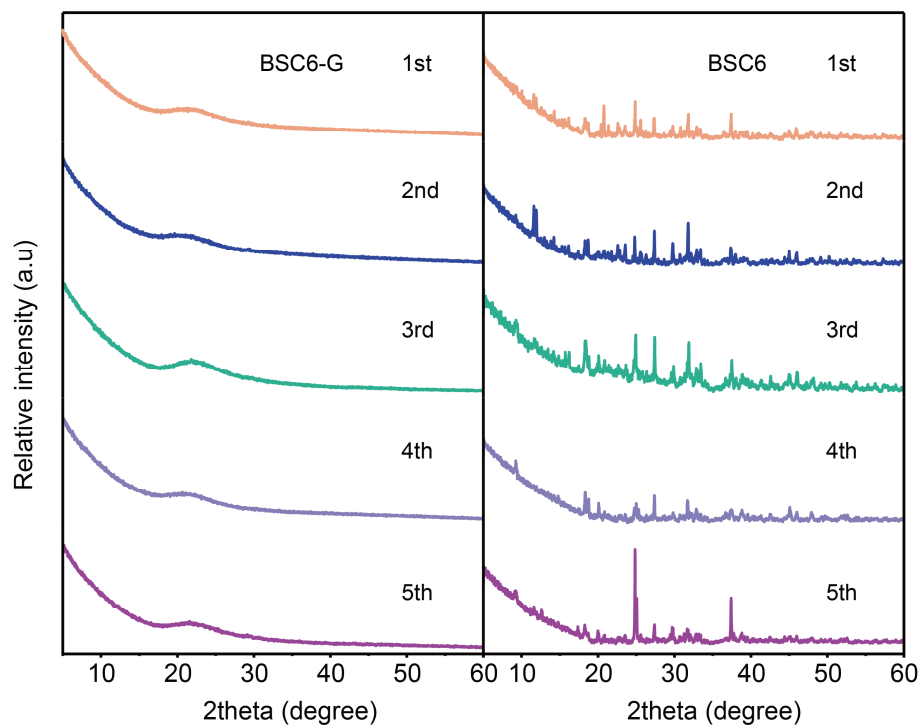

Figure S27. XRD patterns of Bzmim<sub>3</sub>SbCl<sub>6</sub> glass (left) and Bzmim<sub>3</sub>SbCl<sub>6</sub> (right) under five cycles of crystal-glass transformation process.



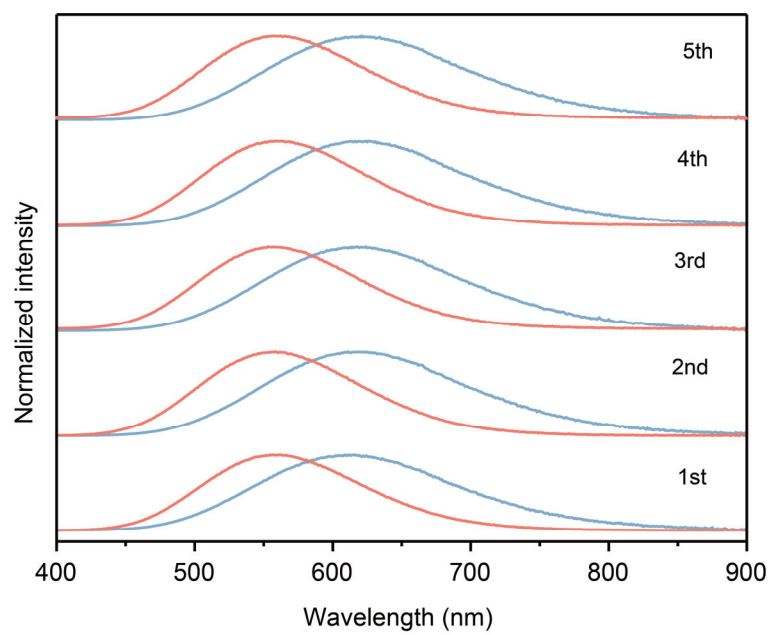

Figure S28. Emission spectra of Bzmim<sub>3</sub>SbCl<sub>6</sub> glass (blue line) and Bzmim<sub>3</sub>SbCl<sub>6</sub> (red line) under five cycles of crystal-glass transformation process.

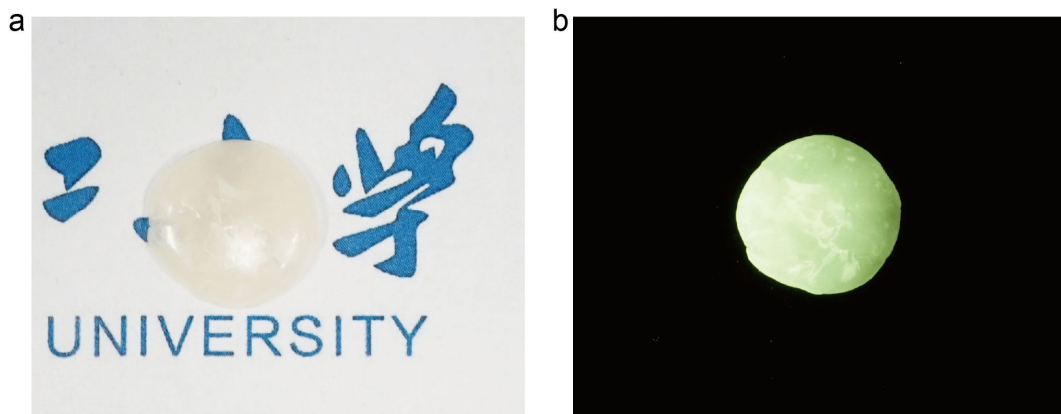

Figure S29. Photograph of  $\text{Bzmim}_3\text{SbCl}_6$  glass after thermal treatment under (a) daylight and (b) 365 nm UV light.

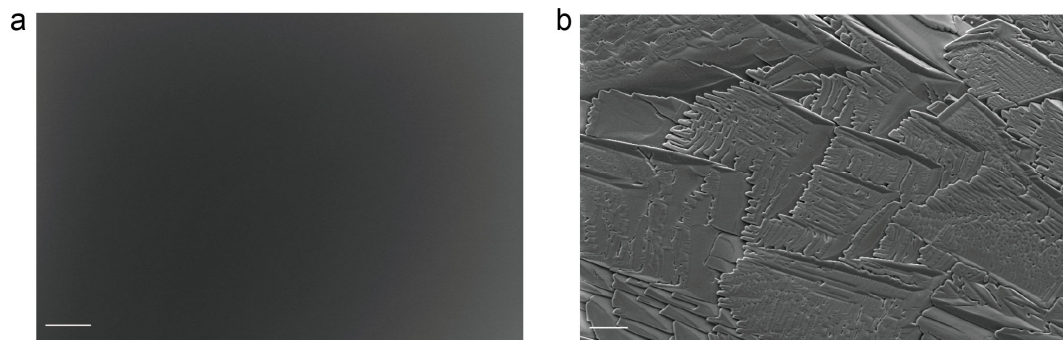

Figure S30. (a) SEM images of Bzmim<sub>2</sub>SbCl<sub>5</sub> glass. (b) SEM images of Bzmim<sub>2</sub>SbCl<sub>5</sub> glass ceramic. The scale bar is 30 μm.

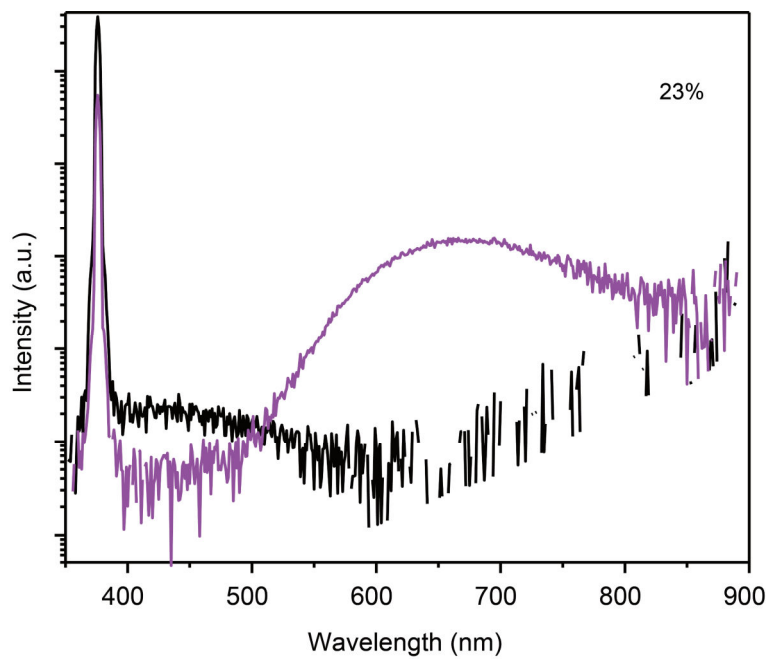

Figure S31. PLQY spectra of Bzmim<sub>2</sub>SbCl<sub>5</sub> glass ceramic.

Table S1. Crystal data and structure refinement for Bzmim<sub>3</sub>SbCl<sub>6</sub>.

|                                                                 |                         |
|-----------------------------------------------------------------|-------------------------|
| Formula                                                         | C33 H39 Cl6 N6 Sb       |
| Temperature (K)                                                 | 150.00                  |
| Formula Weight                                                  | 854.18                  |
| Crystal system                                                  | monoclinic              |
| Space group                                                     | <i>P</i> 2 <sub>1</sub> |
| <i>a</i> [Å]                                                    | 9.7360(6)               |
| <i>b</i> [Å]                                                    | 26.6108(15)             |
| <i>c</i> [Å]                                                    | 14.4804(10)             |
| $\alpha$ [°]                                                    | 90                      |
| $\beta$ [°]                                                     | 91.792(4)               |
| $\gamma$ [°]                                                    | 90                      |
| <i>V</i> [Å <sup>3</sup> ]                                      | 3751.6 (4)              |
| <i>Z</i>                                                        | 4                       |
| <i>D</i> <sub>c</sub> [g cm <sup>-3</sup> ]                     | 1.513                   |
| Radiation, $\lambda$ [Å]                                        | 1.34138                 |
| <i>R</i> <sub>int</sub>                                         | 0.0585                  |
| <i>R</i> 1 [ <i>I</i> > 2 $\sigma$ ( <i>I</i> )] <sup>a)</sup>  | 0.0685                  |
| <i>wR</i> 2 [ <i>I</i> > 2 $\sigma$ ( <i>I</i> )] <sup>b)</sup> | 0.1679                  |
| <i>R</i> 1 (all data)                                           | 0.0854                  |
| <i>wR</i> 2 (all data)                                          | 0.1821                  |
| GOF                                                             | 1.042                   |

<sup>a)</sup>  $R1 = \frac{\sum ||F_o| - |F_c||}{\sum |F_o|}$ ; <sup>b)</sup>  $wR2 = [\frac{\sum w(F_o^2 - F_c^2)^2}{\sum w(F_o^2)^2}]^{1/2}$ .

Table S2. Crystal data and structure refinement for Bzmim<sub>2</sub>SbCl<sub>5</sub>.

|                                                                            |                                                                                 |
|----------------------------------------------------------------------------|---------------------------------------------------------------------------------|
| Formula                                                                    | C <sub>44</sub> H <sub>52</sub> Cl <sub>10</sub> N <sub>8</sub> Sb <sub>2</sub> |
| Temperature (K)                                                            | 150 K                                                                           |
| Formula Weight                                                             | 1290.93                                                                         |
| Crystal system                                                             | tetragonal                                                                      |
| Space group                                                                | $\bar{I}4$                                                                      |
| <i>a</i> [Å]                                                               | 17.5697(15)                                                                     |
| <i>b</i> [Å]                                                               | 17.5697(15)                                                                     |
| <i>c</i> [Å]                                                               | 8.7813(10)                                                                      |
| $\alpha$ [°]                                                               | 90                                                                              |
| $\beta$ [°]                                                                | 90                                                                              |
| $\gamma$ [°]                                                               | 90                                                                              |
| <i>V</i> [Å <sup>3</sup> ]                                                 | 2710.7(6)                                                                       |
| <i>Z</i>                                                                   | 2                                                                               |
| <i>D<sub>c</sub></i> [g cm <sup>-3</sup> ]                                 | 1.582                                                                           |
| Radiation, $\lambda$ [Å]                                                   | 1.34138                                                                         |
| <i>R</i> <sub>int</sub>                                                    | 0.0585                                                                          |
| <i>R</i> <sub>1</sub> [ <i>I</i> > 2 $\sigma$ ( <i>I</i> )] <sup>a)</sup>  | 0.0643                                                                          |
| <i>wR</i> <sub>2</sub> [ <i>I</i> > 2 $\sigma$ ( <i>I</i> )] <sup>b)</sup> | 0.1684                                                                          |
| <i>R</i> <sub>1</sub> (all data)                                           | 0.1051                                                                          |
| <i>wR</i> <sub>2</sub> (all data)                                          | 0.1917                                                                          |
| GOF                                                                        | 1.066                                                                           |
| Flack parameter                                                            | -0.017(10)                                                                      |

<sup>a)</sup>  $R_1 = \frac{\sum ||F_o| - |F_c||}{\sum |F_o|}$ ; <sup>b)</sup>  $wR_2 = [\frac{\sum w(F_o^2 - F_c^2)^2}{\sum w(F_o^2)^2}]^{1/2}$ .

Table S3. List of hydrogen bonds in Bzmim<sub>3</sub>SbCl<sub>6</sub>.

|                | Bond            | Distance [Å] | Angle [°] |
|----------------|-----------------|--------------|-----------|
| Sb1            | C2-H2...Cl1     | 2.6822       | 133.018   |
|                | C15-H15A...Cl1  | 2.6680       | 163.664   |
|                | C33-H33B...Cl1  | 2.6538       | 171.581   |
|                | C56-H56...Cl1   | 2.7299       | 142.712   |
|                | C54-H54...Cl2   | 2.8835       | 158.200   |
|                | C44-H44B...Cl3  | 2.625        | 133.635   |
|                | C48-H48B...Cl3  | 2.6552       | 137.387   |
|                | C15-H15B...Cl4  | 2.6857       | 166.880   |
|                | C33-H33C...Cl4  | 2.8804       | 164.834   |
|                | C66-H66A...Cl4  | 2.7638       | 157.343   |
|                | C3-H3...Cl5     | 2.6921       | 151.331   |
|                | C56-H56...Cl6   | 2.8523       | 125.748   |
|                | C65-H65...Cl6   | 2.7004       | 156.865   |
|                | C23-H23...Cl6   | 2.7901       | 1447.329  |
| Sb2            | C57-H57...Cl7   | 2.8205       | 131.227   |
|                | C37-H37B...Cl7  | 2.6517       | 156.896   |
|                | C55-H55B...Cl7  | 2.7164       | 163.420   |
|                | C18-H18...Cl7   | 2.8612       | 130.743   |
|                | C1-H1...Cl7     | 2.5721       | 140.150   |
|                | C34-H34...Cl8   | 2.7368       | 137.929   |
|                | C37-H37A...Cl8  | 2.7995       | 150.335   |
|                | C26-H26A...Cl9  | 2.8581       | 143.417   |
|                | C22-H22B...Cl10 | 2.7683       | 149.194   |
|                | C24-H24...Cl10  | 2.8437       | 154.297   |
|                | C6-H6...Cl11    | 2.6499       | 157.963   |
|                | C45-H45...Cl11  | 2.5760       | 155.07    |
|                | C1-H1...Cl11    | 2.8848       | 130.787   |
|                | C44-H44A...Cl12 | 2.6219       | 168.430   |
|                | C35-H35...Cl12  | 2.8335       | 162.612   |
| C58-H58...Cl12 | 2.7686          | 137.641      |           |

Table S4. List of hydrogen bonds in Bzmim<sub>2</sub>SbCl<sub>5</sub>.

|     | Bond          | Distance [Å] | Angle [°] |
|-----|---------------|--------------|-----------|
| Sb1 | C3-H11B...Cl2 | 2.6106       | 165.977   |
|     | C1-H1...Cl1   | 2.8274       | 143.859   |

|     |                |        |         |
|-----|----------------|--------|---------|
|     | C1-H1...Cl1    | 2.8274 | 143.859 |
|     | C1-H1...Cl1    | 2.8274 | 143.859 |
|     | C1-H1...Cl1    | 2.8274 | 143.859 |
| Sb2 | C11-H11C...Cl3 | 2.8493 | 167.001 |
|     | C2-H2...Cl3    | 2.7623 | 136.045 |
|     | C11-H11C...Cl3 | 2.8493 | 167.001 |
|     | C2-H2...Cl3    | 2.7623 | 136.045 |
|     | C11-H11C...Cl3 | 2.8493 | 167.001 |
|     | C2-H2...Cl3    | 2.7623 | 136.045 |
|     | C11-H11C...Cl3 | 2.8493 | 167.001 |
|     | C2-H2...Cl3    | 2.7623 | 136.045 |
|     | C3-H3...Cl4    | 2.5570 | 171.221 |

Table S5.  $T_g/T_m$  and  $T_m$  for the materials highlighted in Figure 3c.

| Material                             | $T_g/T_m$ | $T_m$ [K] | Ref       |
|--------------------------------------|-----------|-----------|-----------|
| B2O3                                 | 0.76      | 723       | 1         |
| SiO2                                 | 0.73      | 2003      | 2         |
| PMMA                                 | 0.77      | 513       | 3         |
| CP                                   | 0.72      | 427       | 4         |
| ZIF62                                | 0.84      | 708       | 5         |
| Water                                | 0.5       | 273       | 6         |
| Bzmim <sub>3</sub> SbCl <sub>6</sub> | 0.74      | 409       | this work |
| Bzmim <sub>2</sub> SbCl <sub>5</sub> | 0.77      | 379       | this work |

Table S6. Summaries of reported  $T_g$ ,  $T_m$  and  $T_g/T_m$  in Sb based metal halide hybrid glasses.

| Compound                                 | $T_m$ | $T_g$ | $T_g/T_m$ | Ref       |
|------------------------------------------|-------|-------|-----------|-----------|
| (S-2-HMM) <sub>3</sub> SbCl <sub>6</sub> | 140   | 22    | 0.71      | 7         |
| Bzmim <sub>3</sub> SbCl <sub>6</sub>     | 137.9 | 32.3  | 0.74      | This work |



|                                      |       |     |      |           |
|--------------------------------------|-------|-----|------|-----------|
| (ETP) <sub>2</sub> SbCl <sub>5</sub> | 149   | 38  | 0.74 | 8         |
| (MEP) <sub>2</sub> SbCl <sub>5</sub> | 214   | 60  | 0.68 | 8         |
| (BUP) <sub>2</sub> SbCl <sub>5</sub> | 140   | 47  | 0.77 | 8         |
| (BTP) <sub>2</sub> SbCl <sub>5</sub> | 226   | 78  | 0.70 | 8         |
| Bmim <sub>2</sub> SbCl <sub>5</sub>  | 76.2  | -20 | 0.72 | This work |
| Bzmim <sub>2</sub> SbCl <sub>5</sub> | 106.2 | 22  | 0.77 | This work |

Table S7. Fitting results of Avrami parameters and crystallization rates for Bzmim<sub>3</sub>SbCl<sub>6</sub> glass at measurement temperatures.

|                        |          |          |          |          |
|------------------------|----------|----------|----------|----------|
| Temperature (°C)       | 80       | 85       | 90       | 95       |
| $k$ (s <sup>-1</sup> ) | 0.001016 | 0.005474 | 0.007063 | 0.013227 |
| $n$                    | 1.63     | 1.92     | 1.77     | 1.68     |

## Reference

- [1] E. D. Zanotto and D. R. Cassar, *Sci. Rep.*, 2017, **7**, 43022.
- [2] G. N. Greaves and S. Sen, *Adv. Phys.*, 2007, **56**, 1-166.
- [3] U. Ali, K. J. B. Abd Karim and N. A. Buang, *Polym. Rev.*, 2015, **55**, 678-705.
- [4] T. D. Bennett, Y. Yue, P. Li, A. Qiao, H. Tao, N. G. Greaves, T. Richards, G. I. Lampronti, S. A. T. Redfern, F. Blanc, O. K. Farha, J. T. Hupp, A. K. Cheetham and D. A. Keen, *J. Am. Chem. Soc.*, 2016, **138**, 3484-3492.
- [5] A. Qiao, T. D. Bennett, H. Tao, A. Krajnc, G. Mali, C. M. Doherty, A. W. Thornton, J. C. Mauro, G. N. Greaves and Y. Yue, *Sci. Adv.*, 2018, **4**, eaao6827.
- [6] G. P. Johari, A. Hallbrucker and E. Mayer, *Nature*, 1987, **330**, 552-553.
- [7] M. Yin, B. Li, Z. Yi, Y. Zhang, Z. Xia and Y. Xu, *Chem. Commun.*, 2023, **59**, 11361-11364.
- [8] W. Wang, C.-D. Liu, X.-B. Han, C.-Q. Jing, C.-Y. Chai, C.-C. Fan, M.-L. Jin, J.-M. Zhang and W. Zhang, *ACS Mater. Lett.*, 2024, **6**, 203-211.
